# Supplementary material for: The Promotions of Sustainable Lunch Meals in School Feeding Programs: The Case of Italy
Source: MDPI journal article supplement (doi:10.3390/nu13051571), 2021-05-07
Supplement: s1 [file s1]

| Sequential<br>number | Dished for primary school                  |    | NUTRITIONAL CONTENT AND GHGs VALUE |               |                      |              |                 |              |                |              |
|----------------------|--------------------------------------------|----|------------------------------------|---------------|----------------------|--------------|-----------------|--------------|----------------|--------------|
|                      |                                            |    | ENERGY<br>(Kcal)                   | LIPIDS<br>(g) | CARBOHYDRATES<br>(g) | TOTAL        |                 |              |                |              |
|                      |                                            |    |                                    |               |                      | SUGAR<br>(g) | PROTEINS<br>(g) | FIBRE<br>(g) | SODIUM<br>(mg) | CO2eq<br>(g) |
| 1                    | Meat ravioli with tomato sauce             | 1  | 355.61                             | 12.24         | 50.60                | 5.33         | 13.83           | 2.17         | 283.30         | 287.03       |
| 2                    | Pasta with mashed chickpeas                | 2  | 250.71                             | 6.48          | 40.60                | 3.42         | 10.02           | 5.38         | 12.65          | 89.13        |
| 3                    | Pasta with mashed beans                    | 3  | 246.81                             | 5.19          | 41.77                | 3.36         | 10.83           | 6.55         | 12.05          | 125.13       |
| 4                    | Pasta with mashed lentils                  | 4  | 243.21                             | 4.89          | 28.06                | 2.85         | 10.56           | 5.44         | 13.25          | 89.13        |
| 5                    | Pasta with mashed vegetables (summer)      | 5  | 201.66                             | 6.24          | 31.40                | 5.39         | 6.89            | 3.00         | 75.25          | 135.06       |
| 6                    | Pasta with mashed vegetables (winter)      | 6  | 204.56                             | 6.25          | 32.02                | 5.71         | 7.02            | 3.15         | 68.75          | 133.76       |
| 7                    | Baked lasagna                              | 7  | 448.41                             | 17.47         | 56.17                | 6.91         | 20.00           | 3.02         | 107.70         | 765.98       |
| 8                    | Pasta with butter and parmigiano           | 8  | 353.86                             | 11.57         | 55.48                | 3.05         | 10.39           | 1.89         | 51.50          | 182.76       |
| 9                    | Pasta with pesto                           | 9  | 338.60                             | 9.23          | 57.87                | 3.92         | 9.26            | 2.54         | 3.43           | 158.89       |
| 10                   | Pasta with tomato sauce                    | 10 | 322.66                             | 6.80          | 58.48                | 6.05         | 10.42           | 2.85         | 48.05          | 250.48       |
| 11                   | Pasta with tomato sauce and basil          | 11 | 320.51                             | 6.79          | 58.06                | 5.63         | 10.32           | 2.66         | 40.50          | 249.28       |
| 12                   | Pasta with ragout                          | 12 | 342.61                             | 7.66          | 58.48                | 6.05         | 13.46           | 2.85         | 56.00          | 482.23       |
| 13                   | Pasta with vegetable ragout                | 13 | 326.36                             | 6.82          | 59.27                | 6.83         | 10.55           | 3.17         | 58.95          | 252.15       |
| 14                   | Pasta with tomato souce and organic trout  | 14 | 318.26                             | 5.84          | 57.77                | 5.34         | 12.15           | 2.61         | 18.40          | 264.68       |
| 15                   | Pasta with tuna                            | 15 | 347.86                             | 7.90          | 57.77                | 5.34         | 14.89           | 2.61         | 89.00          | 319.28       |
| 16                   | Pasta with vegetables                      | 16 | 324.86                             | 6.82          | 58.76                | 6.31         | 10.68           | 3.09         | 52.45          | 258.48       |
| 17                   | Pasta with tomato souce and bacon          | 17 | 371.73                             | 10.94         | 58.06                | 5.63         | 13.75           | 2.66         | 323.40         | 359.06       |
| 18                   | Pasta with tomato sauce garlic and parsley | 18 | 299.86                             | 5.38          | 57.77                | 5.34         | 8.59            | 2.61         | 10.00          | 219.28       |
| 19                   | Pasta with tomato sauce garlic and oregano | 19 | 299.86                             | 5.38          | 57.77                | 5.34         | 8.59            | 2.61         | 10.00          | 219.28       |
| 20                   | Pasta with eggs and tomato sauce           | 20 | 295.16                             | 7.26          | 49.85                | 4.31         | 10.59           | 2.88         | 55.45          | 214.28       |
| 21                   | Pasta with zucchini                        | 21 | 308.11                             | 6.43          | 56.22                | 3.75         | 9.88            | 2.42         | 42.10          | 154.88       |
| 22                   | Pasta with potatoes                        | 22 | 200.76                             | 6.29          | 31.90                | 2.43         | 6.06            | 1.78         | 42.95          | 127.48       |
| 23                   | Pasta with tomato sauce and anchovies      | 23 | 315.31                             | 6.22          | 57.79                | 5.36         | 10.53           | 2.61         | 46.00          | 236.31       |
| 24                   | Pasta with tomato sauce and ricotta        | 24 | 332.51                             | 7.58          | 59.18                | 6.75         | 10.50           | 2.85         | 33.65          | 285.33       |

|    |                                                |    |        |       |       |      |       |      |        |        |
|----|------------------------------------------------|----|--------|-------|-------|------|-------|------|--------|--------|
| 25 | Risotto with butter and Parmigiano             | 25 | 342.66 | 10.80 | 57.02 | 0.32 | 7.94  | 0.35 | 55.00  | 273.76 |
| 26 | Risotto with potatoes                          | 26 | 195.96 | 5.96  | 32.56 | 1.26 | 5.01  | 1.12 | 44.45  | 166.48 |
| 27 | Risotto with tomato sauce                      | 27 | 311.46 | 6.03  | 60.02 | 3.32 | 7.97  | 1.31 | 51.55  | 341.48 |
| 28 | Risotto with saffron                           | 28 | 292.51 | 5.62  | 57.20 | 0.50 | 6.91  | 0.40 | 36.80  | 229.88 |
| 29 | Risotto with mashed peas                       | 29 | 306.91 | 5.68  | 59.76 | 1.32 | 7.99  | 1.96 | 62.60  | 285.48 |
| 30 | Risotto with endive                            | 30 | 297.31 | 5.71  | 58.01 | 1.31 | 7.18  | 0.88 | 39.80  | 235.88 |
| 31 | Risotto with pumpkin                           | 31 | 297.91 | 5.65  | 58.25 | 1.25 | 7.24  | 0.79 | 37.10  | 241.88 |
| 32 | Risotto with zucchini                          | 32 | 295.81 | 5.65  | 57.62 | 0.89 | 7.30  | 0.76 | 43.40  | 241.88 |
| 33 | Tortellini with butter and Parmigiano          | 33 | 456.86 | 20.31 | 55.01 | 2.54 | 16.89 | 1.80 | 413.20 | 212.41 |
| 34 | Pasta with butter, Parmigiano and tomato sauce | 34 | 352.61 | 8.82  | 61.25 | 6.59 | 10.78 | 2.70 | 39.95  | 284.39 |
| 35 | Risotto with mushrooms                         | 35 | 285.83 | 4.47  | 57.27 | 0.57 | 7.70  | 0.63 | 26.58  | 264.25 |
| 36 | Pasta with peas                                | 36 | 223.45 | 5.71  | 38.33 | 4.02 | 7.11  | 5.03 | 66.60  | 206.40 |
| 37 | Potato gnocchi with ragout                     | 37 | 410.52 | 10.04 | 65.89 | 4.62 | 17.90 | 5.05 | 80.45  | 830.16 |
| 38 | Risotto with lemon                             | 38 | 294.57 | 5.62  | 57.67 | 0.97 | 6.98  | 0.41 | 37.50  | 237.21 |
| 39 | Tortellini with tomato sauce                   | 39 | 420.15 | 14.99 | 58.46 | 5.98 | 16.36 | 2.91 | 403.70 | 269.68 |
| 40 | Vegetable soup with rice                       | 40 | 264.38 | 4.91  | 46.68 | 2.06 | 11.26 | 6.25 | 36.60  | 186.99 |
| 41 | Pasta with cured ham                           | 41 | 361.76 | 10.26 | 58.52 | 3.86 | 12.46 | 1.98 | 125.25 | 224.68 |
| 42 | Pasta with cheeses                             | 42 | 364.16 | 10.11 | 56.53 | 4.10 | 15.26 | 1.89 | 156.35 | 309.08 |
| 43 | Rice and Parmigiano soup                       | 43 | 179.30 | 7.83  | 24.78 | 0.48 | 3.99  | 0.21 | 33.58  | 131.38 |
| 44 | Potato gnocchi with tomato sauce               | 44 | 370.62 | 8.33  | 65.89 | 4.62 | 11.81 | 5.05 | 64.55  | 366.66 |
| 45 | Risotto with vegetables                        | 45 | 325.00 | 6.96  | 61.32 | 2.85 | 8.16  | 2.68 | 84.56  | 296.22 |
| 46 | Pasta with tomato and mozzarella               | 46 | 352.52 | 9.05  | 58.50 | 6.06 | 12.91 | 2.98 | 53.15  | 313.26 |
| 47 | Tortellini with butter and sage                | 47 | 431.54 | 18.72 | 54.97 | 2.50 | 14.18 | 1.80 | 364.92 | 158.69 |
| 48 | Vegetable soup with beans and Parmigiano       | 48 | 303.22 | 6.71  | 49.86 | 3.58 | 13.86 | 7.96 | 35.75  | 169.56 |
| 49 | Pasta with aubergine                           | 49 | 318.67 | 6.38  | 58.81 | 6.38 | 10.04 | 3.65 | 38.40  | 288.89 |
| 50 | Vegetable soup (summer)                        | 50 | 183.88 | 4.93  | 30.17 | 2.12 | 6.61  | 2.72 | 32.90  | 107.27 |
| 51 | Rice salad with vegetables, tuna and eggs      | 51 | 380.94 | 11.68 | 59.77 | 1.77 | 12.93 | 1.83 | 138.70 | 393.82 |

|    |                                              |    |        |       |       |       |       |      |         |         |
|----|----------------------------------------------|----|--------|-------|-------|-------|-------|------|---------|---------|
| 52 | Risotto with artichokes                      | 52 | 297.70 | 5.42  | 58.25 | 1.31  | 7.66  | 2.61 | 84.10   | 335.34  |
| 53 | Pasta salad with vegetables, tuna and eggs   | 53 | 384.74 | 12.39 | 56.32 | 3.89  | 15.46 | 2.19 | 73.55   | 352.92  |
| 54 | Pasta with vegetables, butter and Parmigiano | 54 | 313.98 | 4.80  | 60.53 | 6.79  | 10.85 | 4.37 | 53.81   | 290.79  |
| 55 | Rice and peas soup                           | 55 | 181.92 | 5.13  | 30.25 | 2.47  | 5.62  | 3.46 | 74.15   | 239.64  |
| 56 | Pasta with pumpkin                           | 56 | 323.50 | 7.45  | 57.76 | 4.73  | 10.02 | 2.72 | 33.90   | 164.55  |
| 57 | Potato gnocchi with tomato sauce             | 57 | 370.62 | 8.33  | 65.89 | 4.62  | 11.81 | 5.05 | 64.55   | 366.66  |
| 58 | Polenta with ragout                          | 58 | 404.30 | 10.52 | 66.14 | 2.70  | 15.33 | 2.93 | 51.20   | 606.20  |
| 59 | Potato gateau                                | 59 | 279.35 | 12.35 | 32.40 | 0.90  | 11.46 | 2.88 | 183.30  | 320.35  |
| 60 | Baked pasta with béchamel sauce              | 60 | 340.30 | 7.69  | 60.65 | 4.50  | 10.91 | 2.04 | 47.35   | 199.33  |
| 61 | Pasta capers and olives                      | 61 | 324.61 | 8.69  | 56.71 | 4.28  | 8.35  | 2.69 | 57.31   | 177.25  |
| 62 | Barley with mashed potatoes                  | 62 | 219.01 | 6.62  | 35.47 | 0.32  | 6.48  | 4.04 | 36.50   | 142.93  |
| 63 | Rice and spinach soup                        | 63 | 170.21 | 5.49  | 26.19 | 0.36  | 5.58  | 1.23 | 66.90   | 285.63  |
| 64 | Rice and cabbage soup                        | 64 | 215.01 | 6.13  | 36.13 | 1.33  | 5.96  | 2.27 | 46.10   | 177.63  |
| 65 | Risotto with mashed leeks                    | 65 | 311.39 | 5.69  | 60.67 | 3.96  | 8.17  | 2.19 | 54.80   | 257.37  |
| 66 | Pizza with mozzarella and tomato sauce       | 66 | 487.80 | 10.08 | 95.22 | 23.22 | 10.08 | 6.84 | 1774.80 | 234.00  |
| 67 | Quiche lorraine with vegetable               | 67 | 431.53 | 32.86 | 20.50 | 0.97  | 14.64 | 1.72 | 505.55  | 523.19  |
| 68 | Semolina dumpling                            | 68 | 392.49 | 17.70 | 45.61 | 8.11  | 15.61 | 1.80 | 146.60  | 420.09  |
| 69 | Rice with tuna and anchovies                 | 69 | 348.04 | 8.45  | 57.07 | 0.37  | 14.49 | 0.35 | 353.38  | 337.44  |
| 70 | Baked pasta with ham and cheese              | 70 | 454.90 | 19.77 | 54.54 | 5.88  | 18.06 | 2.22 | 283.95  | 449.58  |
| 71 | Roasted lamb with potatoes                   | 71 | 351.51 | 18.41 | 26.85 | 0.60  | 21.15 | 2.40 | 89.70   | 293.43  |
| 72 | Roasted lamb with rosemary                   | 72 | 179.06 | 11.92 | 0.00  | 0.00  | 18.00 | 0.00 | 79.20   | 165.08  |
| 73 | Roasted beef                                 | 73 | 133.86 | 5.65  | 1.09  | 1.09  | 19.83 | 0.39 | 49.70   | 1399.74 |
| 74 | Roasted pork                                 | 74 | 190.76 | 12.91 | 0.00  | 0.00  | 18.72 | 0.00 | 53.10   | 335.18  |
| 75 | Roasted turkey                               | 75 | 137.46 | 5.11  | 1.09  | 1.09  | 21.81 | 0.39 | 59.60   | 178.44  |
| 76 | Boiled beef with balsamic vinegar            | 76 | 155.74 | 9.13  | 0.01  | 0.01  | 18.28 | 0.00 | 48.10   | 1399.72 |
| 77 | Roasted chicken leg                          | 77 | 233.96 | 13.45 | 0.00  | 0.00  | 28.05 | 0.00 | 100.50  | 288.68  |
| 78 | Breaded pork cutlet                          | 78 | 237.71 | 14.14 | 7.00  | 0.45  | 21.12 | 0.34 | 105.54  | 376.58  |
| 79 | Croquettes of cod fillets                    | 79 | 151.17 | 5.21  | 7.71  | 0.36  | 18.79 | 0.34 | 103.06  | 525.90  |

|     |                                             |     |        |       |       |      |       |      |        |         |
|-----|---------------------------------------------|-----|--------|-------|-------|------|-------|------|--------|---------|
| 80  | Croquettes of hake fillets                  | 80  | 151.17 | 5.21  | 7.71  | 0.36 | 18.79 | 0.34 | 103.06 | 380.70  |
| 81  | Turkey breast with lemon                    | 81  | 145.90 | 5.12  | 3.05  | 0.07 | 22.06 | 0.12 | 46.88  | 181.72  |
| 82  | Roasted turkey breast                       | 82  | 132.26 | 5.08  | 0.00  | 0.00 | 21.60 | 0.00 | 46.80  | 175.88  |
| 83  | Gratin dab fillets                          | 83  | 140.86 | 5.52  | 3.61  | 0.34 | 19.48 | 0.17 | 150.00 | 360.98  |
| 84  | Breaded dab fillets                         | 84  | 190.22 | 7.24  | 9.45  | 0.71 | 22.47 | 0.46 | 204.66 | 417.08  |
| 85  | Gratin cod fillets                          | 85  | 126.56 | 4.75  | 3.50  | 0.23 | 17.61 | 0.17 | 92.80  | 506.18  |
| 86  | Gratin hake fillets                         | 86  | 126.56 | 4.75  | 3.50  | 0.23 | 17.61 | 0.17 | 92.80  | 360.98  |
| 87  | Breadel sea bass fillets                    | 87  | 190.22 | 7.24  | 9.45  | 0.71 | 22.47 | 0.46 | 204.66 | 386.28  |
| 88  | Veal fillet with lemon                      | 88  | 152.72 | 6.49  | 4.57  | 0.11 | 19.32 | 0.17 | 80.22  | 1387.94 |
| 89  | Chicken breast with basil and parsley sauce | 89  | 171.52 | 7.33  | 4.81  | 0.35 | 21.96 | 0.58 | 31.19  | 211.52  |
| 90  | Spinach omelette                            | 90  | 120.77 | 9.19  | 1.20  | 0.18 | 8.33  | 0.72 | 109.30 | 270.49  |
| 91  | Hake fillets with tomato sauce              | 91  | 121.26 | 4.91  | 1.50  | 1.50 | 17.76 | 0.45 | 79.30  | 425.48  |
| 92  | Cod fillets with tomato sauce               | 92  | 121.26 | 4.91  | 1.50  | 1.50 | 17.76 | 0.45 | 79.30  | 570.68  |
| 93  | Turkey breast with butter and sage          | 93  | 134.20 | 5.25  | 0.06  | 0.06 | 21.64 | 0.00 | 47.15  | 186.00  |
| 94  | Veal cutlet                                 | 94  | 154.21 | 5.62  | 5.45  | 0.35 | 20.83 | 0.27 | 124.54 | 1415.24 |
| 95  | Omelette with field herbs                   | 95  | 111.57 | 9.19  | 0.00  | 0.00 | 7.21  | 0.00 | 86.50  | 159.29  |
| 96  | Cuttlefish with peas                        | 96  | 157.46 | 5.95  | 8.07  | 3.72 | 18.46 | 4.17 | 173.90 | 924.08  |
| 97  | Zucchini omelette                           | 97  | 115.97 | 9.23  | 0.56  | 0.52 | 7.73  | 0.48 | 95.30  | 175.29  |
| 98  | Ham omelette                                | 98  | 143.82 | 11.39 | 0.14  | 0.14 | 10.18 | 0.00 | 183.70 | 224.54  |
| 99  | Scallops with tomato sauce                  | 99  | 180.32 | 9.29  | 5.17  | 0.71 | 19.20 | 0.35 | 49.62  | 1433.54 |
| 100 | Fillet of baked dory                        | 100 | 101.77 | 3.66  | 0.00  | 0.00 | 17.16 | 0.00 | 74.80  | 500.01  |
| 101 | Burgers with tomato sauce                   | 101 | 186.80 | 11.83 | 1.23  | 1.23 | 18.77 | 0.36 | 51.51  | 1462.46 |
| 102 | Stew with potatoes                          | 102 | 272.70 | 11.50 | 21.98 | 2.72 | 21.40 | 2.50 | 72.15  | 1558.42 |
| 103 | Meatballs with parsley                      | 103 | 209.50 | 10.70 | 7.21  | 1.39 | 21.40 | 1.03 | 102.74 | 1500.36 |
| 104 | Stew with vegetables                        | 104 | 184.28 | 10.24 | 3.72  | 2.41 | 19.43 | 1.90 | 86.00  | 1454.81 |
| 105 | Tomato and mozzarella salad                 | 105 | 243.96 | 18.45 | 3.85  | 3.85 | 15.86 | 1.20 | 86.20  | 744.68  |
| 106 | Fillet of baked dogfish                     | 106 | 151.24 | 5.40  | 7.53  | 1.57 | 18.52 | 0.23 | 132.16 | 337.36  |
| 107 | Turkey stew                                 | 107 | 162.00 | 9.72  | 1.65  | 1.65 | 17.07 | 0.52 | 70.15  | 216.05  |

|     |                                   |     |        |       |       |      |       |      |        |         |
|-----|-----------------------------------|-----|--------|-------|-------|------|-------|------|--------|---------|
| 108 | Dogfish cutlet                    | 108 | 145.91 | 4.51  | 6.88  | 1.78 | 19.80 | 0.27 | 176.44 | 361.74  |
| 109 | Baked meatballs with tomato sauce | 109 | 225.61 | 11.63 | 9.28  | 2.00 | 21.37 | 0.83 | 108.64 | 1510.25 |
| 110 | Baked breaded cod sticks          | 110 | 240.45 | 7.10  | 26.85 | 0.60 | 18.75 | 2.40 | 78.50  | 578.35  |
| 111 | Baked pork loin                   | 111 | 143.95 | 7.88  | 0.00  | 0.00 | 18.18 | 0.00 | 68.40  | 399.85  |
| 112 | Baked chicken and turkey sausage  | 112 | 170.95 | 10.70 | 0.00  | 0.00 | 18.60 | 0.00 | 71.00  | 196.35  |
| 113 | Baked potato omelette             | 113 | 213.30 | 11.75 | 17.90 | 0.40 | 9.98  | 1.60 | 105.50 | 252.70  |
| 114 | Butter and sage turkey breast     | 114 | 127.90 | 4.89  | 0.06  | 0.06 | 21.01 | 0.00 | 30.05  | 186.00  |
| 115 | Slice of meat with tomato sauce   | 115 | 151.75 | 7.68  | 1.50  | 1.50 | 19.23 | 0.45 | 84.60  | 1449.85 |
| 116 | Baked codfish balls               | 116 | 154.46 | 8.10  | 0.00  | 0.00 | 20.32 | 0.00 | 121.24 | 565.10  |
| 117 | Tuna salad                        | 117 | 150.10 | 5.62  | 11.28 | 2.51 | 14.20 | 1.68 | 195.50 | 246.56  |
| 118 | Boiled meat with tomato sauce     | 118 | 175.15 | 10.38 | 1.50  | 1.50 | 18.87 | 0.45 | 52.20  | 1467.85 |
| 119 | Meatloaf with milk sauce          | 119 | 243.56 | 17.10 | 0.53  | 0.53 | 21.80 | 0.00 | 99.19  | 1491.96 |
| 120 | Baked anchovies with lemon        | 120 | 165.82 | 7.74  | 7.02  | 1.92 | 17.52 | 0.27 | 132.10 | 243.55  |
| 121 | Tuna pie with potatoes and eggs   | 121 | 186.61 | 10.09 | 9.06  | 0.20 | 15.35 | 0.80 | 200.44 | 280.75  |
| 122 | Omelette                          | 122 | 131.55 | 11.14 | 0.23  | 0.23 | 7.60  | 0.00 | 84.25  | 205.30  |
| 123 | Asiago cheese                     | 123 | 179.50 | 12.80 | 0.40  | 0.40 | 15.70 | 0.00 | 380.00 | 334.85  |
| 124 | Caciotta cheese                   | 124 | 192.00 | 15.50 | 0.90  | 0.90 | 12.25 | 0.00 | 257.00 | 334.85  |
| 125 | Crescenza cheese                  | 125 | 196.70 | 16.31 | 1.33  | 1.33 | 11.27 | 0.00 | 245.00 | 235.20  |
| 126 | Montasio cheese                   | 126 | 205.50 | 16.10 | 1.00  | 1.00 | 15.15 | 0.00 | 378.50 | 334.85  |
| 127 | Provolone cheese                  | 127 | 187.00 | 14.10 | 1.00  | 1.00 | 14.05 | 0.00 | 430.00 | 334.85  |
| 128 | Omelette                          | 128 | 99.96  | 8.35  | 0.00  | 0.00 | 6.20  | 0.00 | 68.50  | 141.68  |
| 129 | Baked beef burgers                | 129 | 175.30 | 9.48  | 3.50  | 0.23 | 19.10 | 0.17 | 69.81  | 1409.78 |
| 130 | Baked pork burger                 | 130 | 196.00 | 12.36 | 3.50  | 0.23 | 17.93 | 0.17 | 87.81  | 410.78  |
| 131 | Breaded cod fillets               | 131 | 135.83 | 5.16  | 4.28  | 0.28 | 18.27 | 0.21 | 102.97 | 519.33  |
| 132 | Breaded hake fillets              | 132 | 135.83 | 5.16  | 4.28  | 0.28 | 18.27 | 0.21 | 102.97 | 374.13  |
| 133 | Breaded sea bass fillets          | 133 | 150.13 | 5.93  | 4.39  | 0.39 | 20.14 | 0.21 | 160.17 | 343.33  |
| 134 | Buffalo mozzarella                | 134 | 187.20 | 15.86 | 0.26  | 0.26 | 10.86 | 0.00 | 130.00 | 631.80  |
| 135 | Roasted chicken breast            | 135 | 125.96 | 4.72  | 0.00  | 0.00 | 20.97 | 0.00 | 29.70  | 175.88  |

|     |                                                    |     |        |       |       |      |       |      |         |         |
|-----|----------------------------------------------------|-----|--------|-------|-------|------|-------|------|---------|---------|
| 136 | Breaded chicken breast                             | 136 | 172.91 | 5.95  | 7.00  | 0.45 | 23.37 | 0.34 | 82.14   | 217.28  |
| 137 | Beef balls with tomato sauce                       | 137 | 182.90 | 9.64  | 4.69  | 1.41 | 19.51 | 0.49 | 73.01   | 1451.83 |
| 138 | Mixed meat balls with tomato sauce                 | 138 | 206.96 | 11.97 | 4.99  | 1.71 | 20.05 | 0.58 | 100.91  | 983.74  |
| 139 | Baked cod fillets meatballs                        | 139 | 135.83 | 5.16  | 4.28  | 0.28 | 18.27 | 0.21 | 102.97  | 519.33  |
| 140 | Baked beef meatloaf                                | 140 | 175.30 | 9.48  | 3.50  | 0.23 | 19.10 | 0.17 | 69.81   | 1409.78 |
| 141 | Baked ham                                          | 141 | 107.50 | 7.35  | 0.45  | 0.45 | 9.90  | 0.00 | 324.00  | 217.50  |
| 142 | Baked ham with lasagna                             | 142 | 53.75  | 3.68  | 0.23  | 0.23 | 4.95  | 0.00 | 162.00  | 108.75  |
| 143 | Cured ham                                          | 143 | 134.00 | 9.20  | 0.00  | 0.00 | 12.75 | 0.00 | 1289.00 | 217.50  |
| 144 | Cured ham with lasagna                             | 144 | 67.00  | 4.60  | 0.00  | 0.00 | 6.38  | 0.00 | 644.50  | 108.75  |
| 145 | Ricotta and cured ham                              | 145 | 154.60 | 11.14 | 2.10  | 2.10 | 11.66 | 0.00 | 691.30  | 301.35  |
| 146 | Slice of meat with cured ham                       | 146 | 152.64 | 7.13  | 0.02  | 0.02 | 22.19 | 0.00 | 294.84  | 1444.06 |
| 147 | Baked beef escalope                                | 147 | 139.48 | 5.33  | 3.07  | 0.09 | 20.10 | 0.12 | 37.12   | 1406.40 |
| 148 | Pork stew with rosemary                            | 148 | 176.36 | 12.01 | 0.00  | 0.00 | 17.10 | 0.00 | 65.70   | 398.18  |
| 149 | Strips of chicken with flour and broth sauce       | 149 | 139.60 | 4.76  | 3.05  | 0.07 | 21.43 | 0.12 | 29.78   | 181.72  |
| 150 | Baked strips of beef                               | 150 | 131.36 | 6.07  | 0.00  | 0.00 | 19.17 | 0.00 | 36.00   | 1397.18 |
| 151 | Tuna with olive oil                                | 151 | 96.00  | 5.05  | 0.00  | 0.00 | 12.60 | 0.00 | 158.00  | 200.00  |
| 152 | Potatoe pie                                        | 152 | 342.60 | 17.17 | 31.96 | 2.44 | 16.86 | 2.57 | 252.04  | 596.28  |
| 153 | Scrambled eggs                                     | 153 | 94.32  | 7.69  | 0.04  | 0.04 | 6.23  | 0.00 | 68.78   | 148.44  |
| 154 | Chard with olive oil                               | 154 | 70.45  | 5.15  | 4.20  | 4.20 | 1.95  | 1.80 | 15.00   | 38.35   |
| 155 | Broccoli with olive oli                            | 155 | 85.45  | 5.60  | 4.65  | 4.65 | 4.50  | 4.65 | 18.00   | 48.85   |
| 156 | Roasted artichokes                                 | 156 | 77.95  | 5.30  | 3.75  | 2.85 | 4.05  | 8.25 | 199.50  | 425.35  |
| 157 | Carrots with olive oil and lemon                   | 157 | 80.25  | 5.20  | 7.67  | 7.67 | 1.11  | 3.10 | 95.10   | 23.85   |
| 158 | Green beans with olive oil                         | 158 | 71.95  | 5.15  | 3.60  | 3.60 | 3.15  | 4.35 | 3.00    | 83.35   |
| 159 | Fennel gratin                                      | 159 | 76.72  | 5.62  | 3.83  | 1.65 | 2.77  | 3.41 | 30.00   | 44.54   |
| 160 | Fried zucchini flowers with mozzarella and anchovy | 160 | 200.00 | 9.04  | 23.28 | 0.32 | 5.92  | 0.96 | 2.16    | 222.40  |
| 161 | Fennel salad                                       | 161 | 55.75  | 5.00  | 1.20  | 1.20 | 1.44  | 2.64 | 4.80    | 0.00    |
| 162 | Tomato salad                                       | 162 | 65.35  | 5.24  | 3.36  | 3.36 | 1.44  | 1.20 | 3.60    | 65.95   |

|     |                                       |     |        |       |       |       |       |      |        |        |
|-----|---------------------------------------|-----|--------|-------|-------|-------|-------|------|--------|--------|
| 163 | Mixed salad with cucumbers (summer)   | 163 | 70.95  | 5.30  | 4.68  | 4.68  | 1.43  | 1.91 | 34.80  | 43.04  |
| 164 | Mixed salad (winter)                  | 164 | 71.15  | 5.18  | 4.84  | 4.84  | 1.55  | 2.55 | 42.70  | 28.36  |
| 165 | Green salad                           | 165 | 58.25  | 5.14  | 2.10  | 2.10  | 1.05  | 0.91 | 4.90   | 22.35  |
| 166 | Mix of potatos carots and green beans | 166 | 105.15 | 5.60  | 12.19 | 3.44  | 2.22  | 2.89 | 32.80  | 72.64  |
| 167 | Baked potatoes                        | 167 | 172.45 | 6.50  | 26.85 | 0.60  | 3.15  | 2.40 | 10.50  | 128.35 |
| 168 | Potatoes with olive oil               | 168 | 172.45 | 6.50  | 26.85 | 0.60  | 3.15  | 2.40 | 10.50  | 128.35 |
| 169 | Crispy baked potatoes                 | 169 | 172.45 | 6.50  | 26.85 | 0.60  | 3.15  | 2.40 | 10.50  | 128.35 |
| 170 | Roasted potatoes                      | 170 | 172.45 | 6.50  | 26.85 | 0.60  | 3.15  | 2.40 | 10.50  | 128.35 |
| 171 | Roasted peas                          | 171 | 103.85 | 5.24  | 10.53 | 3.57  | 4.37  | 6.29 | 103.70 | 231.40 |
| 172 | Mashed potatoes                       | 172 | 231.97 | 10.92 | 29.05 | 2.80  | 6.04  | 2.40 | 56.21  | 235.88 |
| 173 | Spinach with butter and Parmigiano    | 173 | 87.88  | 5.29  | 4.56  | 0.73  | 5.58  | 2.70 | 109.85 | 457.28 |
| 174 | Spinach with olive oil                | 174 | 79.45  | 5.00  | 4.50  | 0.68  | 4.20  | 2.70 | 85.50  | 425.35 |
| 175 | Zucchini gratin                       | 175 | 75.49  | 5.23  | 5.21  | 2.15  | 2.35  | 1.95 | 49.00  | 72.35  |
| 176 | Sautéed zucchini                      | 176 | 61.45  | 5.15  | 2.10  | 1.95  | 1.95  | 1.80 | 33.00  | 68.35  |
| 177 | Carrots with butter                   | 177 | 90.40  | 4.47  | 11.46 | 11.46 | 1.69  | 4.65 | 142.85 | 38.25  |
| 178 | Eggplant with tomato sauce            | 178 | 79.75  | 5.78  | 5.02  | 5.02  | 2.11  | 4.60 | 46.00  | 256.95 |
| 179 | Peas with cured ham                   | 179 | 135.32 | 6.37  | 11.56 | 3.73  | 8.72  | 7.02 | 503.08 | 328.89 |
| 180 | Mixed vegetables gratin               | 180 | 70.38  | 3.81  | 6.47  | 4.23  | 2.98  | 2.96 | 55.21  | 170.69 |
| 181 | Savoy cabbage with tomato             | 181 | 81.85  | 5.35  | 4.95  | 4.95  | 3.48  | 4.71 | 38.10  | 104.05 |
| 182 | Baked asparagus with bechamel         | 182 | 117.54 | 5.48  | 9.23  | 6.26  | 8.47  | 3.50 | 40.26  | 136.88 |
| 183 | Mushrooms with parsley                | 183 | 74.95  | 5.30  | 1.20  | 1.20  | 5.55  | 1.05 | 7.50   | 158.35 |
| 184 | Green beans with tomato sauce         | 184 | 80.35  | 5.35  | 4.80  | 4.80  | 3.63  | 4.71 | 6.60   | 138.55 |
| 185 | Peppers gratin                        | 185 | 57.16  | 2.96  | 6.44  | 6.44  | 1.59  | 3.29 | 53.91  | 176.50 |
| 186 | Peppers with olive oil                | 186 | 77.95  | 5.45  | 6.30  | 6.30  | 1.35  | 2.85 | 3.00   | 173.35 |
| 187 | Roasted new potatoes                  | 187 | 149.95 | 5.45  | 23.55 | 0.30  | 3.00  | 2.10 | 15.00  | 128.35 |
| 188 | Baked ootatoes croquette              | 188 | 205.89 | 7.65  | 30.81 | 0.92  | 5.19  | 2.59 | 47.36  | 177.56 |
| 189 | Chickpeas with tomato sauce           | 189 | 242.95 | 8.98  | 29.34 | 3.42  | 13.02 | 8.52 | 7.20   | 93.55  |
| 190 | Cauliflower with anchovy sauce        | 190 | 89.30  | 5.45  | 4.17  | 3.72  | 6.05  | 3.60 | 192.20 | 30.20  |

|     |                                 |     |        |      |       |       |      |      |        |       |
|-----|---------------------------------|-----|--------|------|-------|-------|------|------|--------|-------|
| 191 | Baked cauliflower with bechamel | 191 | 109.54 | 5.52 | 8.08  | 4.66  | 7.29 | 3.72 | 45.76  | 82.38 |
| 192 | Fennel with butter              | 192 | 66.88  | 5.29 | 1.56  | 1.56  | 3.18 | 3.30 | 30.35  | 61.73 |
| 193 | Bread                           | 193 | 110.00 | 0.20 | 25.40 | 0.80  | 3.24 | 1.52 | 117.20 | 40.00 |
| 194 | Fruits                          | 194 | 63.33  | 0.20 | 15.48 | 15.48 | 0.89 | 2.70 | 2.67   | 47.40 |
